# Supplementary material
Source: publisher figshare collection journal article supplement (https://gsajournals.figshare.com/ndownloader/files/29131173)
Supplement: Supplementary file 1 [file 29131173]

## Sheet: Table S2A
Table S2A. Estimations using the 1000G ORs averaged across chromosomes (Tables 1 and 2) for each 1000G population
		Incomplete sweeps
			95%CI					95%CI					95%CI					95%CI					95%CI					95%CI
Continent	population	X	lower-upper				X1	lower-upper				X2	lower-upper				X3	lower-upper				S	lower-upper				T (kya)	lower-upper
Africa	ESN	59	34	-	85		26.9843	15.4824	-	40.076		26.0153	13.8899	-	39.3277		6.2985	2.1738	-	11.4027		0.0106	0.0052	-	0.0201		43.6281	28.9752	-	52.9265
Africa	GWD	67	40	-	96		26.7542	13.8161	-	39.6269		32.3527	17.9996	-	47.6769		7.7509	2.9933	-	13.532		0.0092	0.0044	-	0.0172		44.0395	33.1304	-	53.0678
Africa	LWK	67	39	-	97		31.3976	19.2308	-	46.6905		28.8984	15.2592	-	43.5752		6.2548	1.0008	-	12.8383		0.0113	0.0071	-	0.0182		42.6066	29.7485	-	50.4865
Africa	MSL	54	31	-	80		23.6495	12.5616	-	35.4938		24.1731	11.2635	-	38.353		6.5129	2.2828	-	11.4026		0.0099	0.0058	-	0.0175		41.9254	30.8769	-	49.8392
Africa	YRI	65	37	-	96		31.8372	17.6812	-	44.7125		26.2011	12.3526	-	41.189		6.701	1.8392	-	12.5034		0.009	0.0048	-	0.0163		47.3803	34.2031	-	55.5783
Europe	CEU	82	44	-	123		19.8365	9.0995	-	31.9715		44.6622	24.0281	-	67.1717		17.8017	7.1005	-	30.367		0.0148	0.0081	-	0.0256		32.0474	20.3171	-	42.0084
Europe	FIN	58	24	-	95		18.9023	9.122	-	29.0682		28.4537	8.7739	-	51.1265		10.6394	0.8975	-	22.2449		0.0174	0.0093	-	0.0301		26.241	12.817	-	37.6014
Europe	GBR	76	39	-	116		23.5318	13.553	-	34.4104		37.965	16.44	-	60.6198		14.1014	4.282	-	26.3496		0.0184	0.0108	-	0.0303		25.8587	13.584	-	36.4302
Europe	IBS	73	36	-	117		26.3017	14.3685	-	37.6892		31.9583	12.5181	-	56.0638		15.1079	4.9058	-	26.683		0.0203	0.0132	-	0.0336		26.0263	12.0514	-	36.7627
Europe	TSI	68	33	-	104		24.942	14.8966	-	36.3957		29.4537	9.7956	-	50.5871		13.3969	3.4011	-	25.7834		0.0144	0.0068	-	0.0257		30.7529	18.0667	-	41.5044
East Asia	CDX	60	23	-	102		19.7091	7.4813	-	32.7591		28.5828	8.3526	-	49.9513		11.4575	1.0131	-	23.8657		0.0146	0.0078	-	0.0242		27.3969	15.984	-	37.6602
East Asia	CHB	102	66	-	139		29.1375	18.3616	-	41.7042		49.9674	30.4	-	71.0873		22.4419	11.6743	-	34.8845		0.0095	0.0042	-	0.0188		40.566	28.5718	-	49.1754
East Asia	CHS	105	63	-	148		31.281	20.1377	-	44.2591		54.7782	32.3995	-	76.6281		18.6134	6.2403	-	33.1689		0.009	0.0033	-	0.0191		40.6897	28.4873	-	49.3208
East Asia	JPT	78	42	-	115		23.5685	12.4657	-	36.3125		37.0023	17.7675	-	56.4514		17.1733	6.6114	-	29.2332		0.0123	0.0057	-	0.022		32.4158	21.3481	-	42.6527
East Asia	KHV	93	58	-	130		30.6082	19.377	-	42.7687		43.8334	25.3023	-	63.0775		18.8729	8.1174	-	31.9646		0.0133	0.007	-	0.0235		33.5274	20.9768	-	43.7018
Africa	mean	62.4	36.2	-	90.8		28.1246	15.7544	-	41.3199		27.5281	14.153	-	42.0244		6.70362	2.05798	-	12.3358		0.01	0.00546	-	0.01786		43.916	31.3868	-	52.3796
Europe	mean	71.4	35.2	-	111		22.7029	12.2079	-	33.907		34.4986	14.3111	-	57.1138		14.2095	4.11738	-	26.2856		0.01706	0.00964	-	0.02906		28.1853	15.3672	-	38.8614
East Asia	mean	87.6	50.4	-	126.8		26.8609	15.5647	-	39.5607		42.8328	22.8444	-	63.4391		17.7118	6.7313	-	30.6234		0.01174	0.0056	-	0.02152		34.9192	23.0736	-	44.5022
		Sweeps (incomplete and complete sweeps)
			95%CI					95%CI					IC_95					IC_95					95%CI					95%CI
Continent	population	X	lower-upper				X1	lower-upper				X2	lower-upper				X3	lower-upper				S	lower-upper				T (kya)	lower-upper
Africa	ESN	56	37	-	77		16.1655	8.8121	-	25.494		29.8843	17.6776	-	42.4539		9.7761	3.0118	-	17.4504		0.0152	0.0091	-	0.025		52.8244	47.6643	-	57.1793
Africa	GWD	75	52	-	100		21.4343	12.7147	-	31.3618		39.9367	26.1773	-	55.0234		13.4356	5.1155	-	22.7998		0.013	0.0072	-	0.0222		53.1571	47.9881	-	57.7331
Africa	LWK	79	55	-	104		22.2547	13.534	-	32.0319		42.3649	27.2795	-	57.8273		14.5543	5.9203	-	23.9225		0.0107	0.005	-	0.0202		53.5698	48.9393	-	57.7716
Africa	MSL	57	37	-	78		16.9011	9.098	-	25.9637		30.9982	18.5103	-	44.8535		9.1106	1.9141	-	17.2477		0.0129	0.0073	-	0.0221		53.678	47.9143	-	58.3917
Africa	YRI	71	49	-	94		19.2127	10.5079	-	28.3346		39.6259	26.6013	-	55.1071		11.8724	3.8415	-	20.8781		0.0115	0.0055	-	0.0217		54.6385	48.8182	-	58.9377
Europe	CEU	94	48	-	139		26.4433	13.8759	-	39.1068		56.6826	25.0762	-	87.3075		10.9548	-1.5286	-	24.3309		0.0108	0.008	-	0.0148		52.0304	49.0549	-	54.8995
Europe	FIN	99	53	-	145		34.3828	21.8918	-	47.1468		47.0351	16.2131	-	78.033		18.0547	5.9197	-	31.5353		0.0112	0.0086	-	0.0147		50.7301	47.9824	-	53.4854
Europe	GBR	126	78	-	169		39.9706	27.8641	-	52.6403		64.9257	33.3612	-	94.7693		21.0475	8.8128	-	35.0799		0.0088	0.0067	-	0.0118		51.7282	49.0765	-	54.2304
Europe	IBS	133	87	-	179		38.2344	26.3439	-	50.7468		67.9617	35.8627	-	98.6818		26.706	14.9246	-	40.8081		0.0089	0.0065	-	0.0121		53.1311	50.3604	-	55.8429
Europe	TSI	121	74	-	166		36.2533	23.6507	-	48.734		64.0376	32.9276	-	94.6019		21.1097	8.6224	-	35.3283		0.0085	0.0063	-	0.0114		52.376	49.6886	-	54.8947
East Asia	CDX	132	86	-	180		40.6794	27.78	-	54.8632		66.4385	36.9231	-	97.641		24.5334	10.8531	-	39.1553		0.0127	0.0082	-	0.0192		53.7862	50.0637	-	57.1008
East Asia	CHB	174	130	-	220		43.0344	30.5717	-	56.2747		96.7962	67.03	-	127.287		34.4871	21.5159	-	48.8898		0.01	0.0061	-	0.0165		55.6165	52.1662	-	58.5901
East Asia	CHS	198	150	-	240		44.5947	30.9661	-	57.4511		112.543	81.4503	-	139.886		41.2915	27.1862	-	56.4399		0.0085	0.0044	-	0.0147		55.2238	51.8397	-	58.3756
East Asia	JPT	152	105	-	197		39.5089	26.4222	-	53.2172		83.1549	52.9762	-	110.887		29.0523	15.7265	-	42.7401		0.0123	0.0083	-	0.0177		54.0529	50.5355	-	57.3013
East Asia	KHV	171	125	-	218		45.4723	32.4074	-	59.296		92.1626	62.7904	-	121.545		33.8157	20.3742	-	48.2626		0.0113	0.007	-	0.0176		54.7129	50.8484	-	58.0332
Africa	mean	67.6	46	-	90.6		19.1937	10.9333	-	28.6372		36.562	23.2492	-	51.053		11.7498	3.96064	-	20.4597		0.01266	0.00682	-	0.02224		53.5736	48.2649	-	58.0027
Europe	mean	114.6	68	-	159.6		35.0569	22.7253	-	47.6749		60.1285	28.6882	-	90.6787		19.5745	7.35018	-	33.4165		0.00964	0.00722	-	0.01296		51.9992	49.2326	-	54.6706
East Asia	mean	165.4	119.2	-	211		42.6579	29.6295	-	56.2204		90.219	60.234	-	119.449		32.636	19.1312	-	47.0975		0.01096	0.0068	-	0.01714		54.6785	51.0907	-	57.8802

## Sheet: Table S2B
Table S2B. Estimations using the 1000G ORs computed merging chromosomes (Tables 1 and 2) for each 1000G population
		Incomplete sweeps
			95%CI					95%CI					95%CI					95%CI					95%CI					95%CI
Continent	population	X	lower-upper				X1	lower-upper				X2	lower-upper				X3	lower-upper				S	lower-upper				T (kya)	lower-upper
Africa	ESN	42	18	-	67		18.6568	8.2049	-	30.2579		18.8282	7.2696	-	32.1962		4.0523	0.0346	-	8.8535		0.0155	0.0095	-	0.0257		34.8075	21.5125	-	45.0407
Africa	GWD	47	22	-	76		19.276	7.5743	-	31.7447		22.6437	9.675	-	36.5671		4.7647	0.3424	-	9.6793		0.0132	0.0073	-	0.0234		38.6169	23.9427	-	49.4011
Africa	LWK	51	25	-	80		20.8705	8.8203	-	33.9171		24.8116	11.2467	-	41.125		5.1546	0.7507	-	10.4747		0.0126	0.0069	-	0.0225		39.757	24.7952	-	50.3471
Africa	MSL	39	14	-	63		16.4517	4.3073	-	28.0978		18.5256	6.3961	-	31.2695		4.0171	-0.3772	-	9.3623		0.0131	0.0081	-	0.0226		37.9628	24.1332	-	47.5264
Africa	YRI	52	26	-	79		24.5215	12.5348	-	37.6326		23.3913	9.9364	-	37.2397		4.1832	-0.3268	-	9.5957		0.0132	0.0079	-	0.0227		40.4592	26.4443	-	50.3207
Europe	CEU	57	29	-	88		19.7146	10.7519	-	28.821		26.4893	9.746	-	44.6879		10.908	3.0279	-	20.342		0.0157	0.0073	-	0.0299		31.2249	16.9344	-	43.1607
Europe	FIN	49	22	-	80		18.5071	9.5413	-	28.2803		22.7899	6.1773	-	40.8086		7.458	-0.3401	-	16.6354		0.0183	0.0101	-	0.0316		25.3687	11.7145	-	37.9124
Europe	GBR	66	31	-	103		21.6402	11.4324	-	32.2728		34.2403	14.1075	-	56.23		10.1315	1.0096	-	20.5238		0.0185	0.0102	-	0.0318		26.7323	12.8552	-	38.9021
Europe	IBS	58	27	-	94		21.5529	12.1649	-	32.4537		27.9325	10.3003	-	49.3562		8.2485	-0.223	-	18.0731		0.0189	0.0109	-	0.032		24.9144	11.1557	-	36.6882
Europe	TSI	49	20	-	83		18.4438	9.452	-	28.3556		23.4106	6.2866	-	44.276		7.3902	-0.899	-	17.0064		0.0195	0.0113	-	0.0327		23.8061	10.2871	-	35.9847
East Asia	CDX	56	26	-	89		16.1534	6.7359	-	27.0008		30.3218	13.6375	-	48.4056		9.7405	0.662	-	21.5533		0.0157	0.0085	-	0.0285		25.94	11.7851	-	37.8014
East Asia	CHB	61	31	-	94		17.7235	8.4914	-	27.796		31.8292	14.6253	-	49.9685		11.8178	2.7614	-	23.3582		0.0136	0.0066	-	0.0254		29.8546	17.0534	-	41.0512
East Asia	CHS	66	35	-	100		19.9884	10.7007	-	31.1824		33.6704	16.6627	-	51.6969		12.0818	3.1269	-	23.4934		0.0126	0.0054	-	0.024		31.8504	19.5372	-	42.4868
East Asia	JPT	54	23	-	86		16.2281	6.7272	-	26.6733		27.9849	10.7106	-	46.4304		9.3122	0.3791	-	20.6304		0.0131	0.0065	-	0.0251		30.6821	17.7811	-	41.4629
East Asia	KHV	61	29	-	94		17.4976	8.2559	-	28.6431		30.7755	13.9021	-	49.0495		12.2687	3.1193	-	24.0025		0.0121	0.0049	-	0.0235		31.7081	19.1002	-	43.1673
Africa	mean	46.2	21	-	73		19.9553	8.28832	-	32.33		21.6401	8.90476	-	35.6795		4.43438	0.08474	-	9.5931		0.01352	0.00794	-	0.02338		38.3207	24.1656	-	48.5272
Europe	mean	55.8	25.8	-	89.6		19.9717	10.6685	-	30.0367		26.9725	9.32354	-	47.0717		8.82724	0.51508	-	18.5161		0.01818	0.00996	-	0.0316		26.4093	12.5894	-	38.5296
East Asia	mean	59.6	28.8	-	92.6		17.5182	8.18222	-	28.2591		30.9164	13.9076	-	49.1102		11.0442	2.00974	-	22.6076		0.01342	0.00638	-	0.0253		30.007	17.0514	-	41.1939
		Sweeps (incomplete and complete sweeps)
			95%CI					95%CI					95%CI					95%CI					95%CI					95%CI
Continent	population	X	lower-upper				X1	lower-upper				X2	lower-upper				X3	lower-upper				S	lower-upper				T (kya)	lower-upper
Africa	ESN	49	30	-	70		14.8025	7.1921	-	23.2346		28.0167	15.7953	-	41.1244		6.6137	-0.6227	-	14.5973		0.0139	0.0066	-	0.0248		52.1561	45.7526	-	57.075
Africa	GWD	60	38	-	84		19.6743	11.4878	-	28.7108		30.0929	16.7066	-	44.7314		10.0434	1.9457	-	18.8284		0.0144	0.0077	-	0.0251		51.5921	45.7628	-	56.0339
Africa	LWK	64	42	-	88		20.8208	12.4595	-	30.2856		31.6973	18.403	-	46.8808		10.9904	2.7207	-	19.9048		0.0139	0.0069	-	0.0241		51.4768	45.7591	-	56.0546
Africa	MSL	54	34	-	77		17.3246	9.4324	-	25.8085		28.3769	15.9225	-	42.3939		8.2323	0.5052	-	16.7138		0.012	0.0056	-	0.0235		52.9639	47.0598	-	57.5577
Africa	YRI	62	41	-	86		17.9388	9.63	-	27.017		33.0495	20.4557	-	47.8848		10.5908	2.4247	-	19.3052		0.0134	0.0073	-	0.0244		51.7293	45.9469	-	56.2101
Europe	CEU	62	19	-	109		22.0887	10.9147	-	34.2954		27.5193	-2.4813	-	57.7621		12.4516	0.9056	-	25.023		0.0105	0.0073	-	0.0146		50.9993	47.5476	-	53.8766
Europe	FIN	82	39	-	128		29.6633	18.8371	-	41.4341		35.6953	4.1834	-	66.6888		17.0967	5.4468	-	30.1655		0.0092	0.0066	-	0.013		51.7542	48.7204	-	54.3885
Europe	GBR	96	51	-	142		34.6639	22.3647	-	47.3248		42.7463	10.9394	-	73.1407		19.072	7.0651	-	32.8187		0.0102	0.0078	-	0.0134		50.7041	47.7978	-	53.3529
Europe	IBS	97	52	-	141		32.9415	21.7591	-	44.9441		44.3705	12.886	-	74.9131		19.3551	7.8581	-	32.6991		0.0085	0.0061	-	0.0119		52.1984	49.1973	-	54.8
Europe	TSI	85	41	-	130		30.5713	19.3957	-	42.4718		36.9934	5.0833	-	68.2785		17.6547	5.9274	-	30.8344		0.0094	0.0068	-	0.013		51.6125	48.6371	-	54.1812
East Asia	CDX	127	83	-	172		29.2477	17.6517	-	42.4329		70.7712	43.664	-	99.6233		27.334	14.788	-	41.4554		0.012	0.0076	-	0.0184		54.0182	50.2873	-	57.6949
East Asia	CHB	126	82	-	169		29.2092	17.4438	-	41.877		70.5163	43.1721	-	99.0453		26.6538	13.8573	-	41.4142		0.0116	0.0076	-	0.0171		53.731	49.9914	-	57.3521
East Asia	CHS	133	87	-	180		34.8884	22.4658	-	48.6299		72.1927	42.2995	-	101.024		26.4114	13.7986	-	41.5607		0.0119	0.0081	-	0.0183		53.1916	49.3209	-	56.5959
East Asia	JPT	121	75	-	167		28.3545	16.0983	-	41.9374		67.1281	38.7711	-	96.0094		25.7963	12.6113	-	40.7294		0.0115	0.0077	-	0.0174		53.4454	49.759	-	56.8346
East Asia	KHV	133	88	-	179		33.7034	21.4403	-	47.194		72.8725	44.0553	-	101.914		26.7283	14.1196	-	41.595		0.0114	0.0076	-	0.0169		53.4698	49.5973	-	56.8932
Africa	mean	57.8	37	-	81		18.1122	10.0404	-	27.0113		30.2467	17.4566	-	44.6031		9.29412	1.39472	-	17.8699		0.01352	0.00682	-	0.02438		51.9836	46.0563	-	56.5862
Europe	mean	84.4	40.4	-	130		29.9857	18.6543	-	42.094		37.465	6.12216	-	68.1566		17.126	5.4406	-	30.3081		0.00956	0.00692	-	0.01318		51.4537	48.38	-	54.1198
East Asia	mean	128	83	-	173.4		31.0806	19.02	-	44.4142		70.6962	42.3924	-	99.5234		26.5848	13.835	-	41.3509		0.01168	0.00772	-	0.01762		53.5712	49.7912	-	57.0741

## Sheet: Table S2C
Table S2C. Estimations changing several technical steps
			Incomplete sweeps
			all ENVsa					all ENVs					all ENVs					all ENVs					purged ENVsb					purged ENVs
			averaged ORc					merged ORd,e					uncorr averaged ORf					uncorr merged ORg					average OR					merged OR
				95%CI					95%CI					95%CI					95%CI					95%CI					95%CI
			X	lower-upper				X	lower-upper				X	lower-upper				X	lower-upper				X	lower-upper				X	lower-upper
Africa		mean	62	36	-	91		46	21	-	73		62	36		89.2		41.2	17.8		67.6		48	26	-	73		46	21	-	73.6
Europe		mean	71	35	-	111		56	26	-	90		64.4	27.2		103.6		47	17.8		78.6		60	32	-	93		43	13	-	75.8
East Asia		mean	88	50	-	127		60	29	-	93		81	47.4		119.6		51	23.8		82.4		67	36	-	98		73	43	-	108
All		mean	74	41	-	110		54	25	-	85		69.1333	36.8667		104.133		46.4	19.8		76.2		58	31	-	88		54	26	-	86
			Sweeps (incomplete and complete sweeps)
			all ENVsa					all ENVs					all ENVs					all ENVs					purged ENVsb					purged ENVs
			averaged ORc					merged ORd,e					uncorr averaged ORf					uncorr merged ORg					average OR					merged OR
				95%CI					95%CI					95%CI					95%CI					95%CI					95%CI
			X	lower-upper				X	lower-upper				X	lower-upper				X	lower-upper				X	lower-upper				X	lower-upper
Africa		mean	68	46	-	91		58	37	-	81		68.6	46.8		91.8		52.6	31.8		75.4		54	35	-	75		49	29	-	69
Europe		mean	115	68	-	160		84	40	-	130		73.6	27.4		118.8		67.6	24.2		112.8		45	11	-	90		66	26	-	109
East Asia		mean	165	119	-	211		128	83	-	173		114.2	68.8		159.4		107.8	63.4		151.4		119	79	-	161		113	72	-	155
All		mean	116	78	-	154		90	53	-	128		85.4667	47.6667		123.333		76	42	-	111		73	42	-	109		76	42	-	111
aestimations shown in Table 1
bestimations obtained excluding ENVs with any significant signals of selection rather than incorporating them in PSVs (Materials and Methods). Lower estimations due to the truncation of selection signals.
cestimations obtained with ORs averaged across chromosomes
destimations obtained with ORs computed merging chromosomes
elower estimations due to lower ORs
fORs which were not corrected for covariates (averaged across chromosomes)
gORs which were not corrected for covariates (merged chromosomes)

## Sheet: Table S2D
Table S2D. Swapping empirical data and simulated demography: estimations performed using the 1000G African ORs with a “wrong” East Asian simulated demography and inversely
			1000G ORs averaged across chromosomes
			Incomplete sweeps					Sweeps
				95%CI					95%CI
Continent	population		X	lower-upper				X	lower-upper
Africa	ESN		72	39	-	106		106	65	-	149
Africa	GWD		85	52	-	123		110	66	-	156
Africa	LWK		89	50	-	129		137	92	-	184
Africa	MSL		71	42	-	105		106	65	-	148
Africa	YRI		107	74	-	144		126	82	-	173
East Asia	CDX		67	38	-	99		94	66	-	124
East Asia	CHB		58	32	-	85		91	66	-	119
East Asia	CHS		94	57	-	130		111	85	-	139
East Asia	JPT		56	27	-	86		88	59	-	116
East Asia	KHV		54	27	-	83		99	73	-	128
Africa	under an East Asian demography		84.8	51.4	-	121.4		117	74	-	162
East Asia	under an African demography		65.8	36.2	-	96.6		96.6	69.8	-	125.2

## Sheet: Table S2E
Table S2E. Swapping empirical data and simulated demography: estimations performed using the 1000G European ORs with a “wrong” East Asian simulated demography and inversely
			1000G ORs averaged across chromosomes
			Incomplete sweeps					Sweeps
				95%CI					95%CI
Continent	population		X	lower-upper				X	lower-upper
Europe	CEU		86	46	-	128		138	92	-	184
Europe	FIN		59	25	-	94		110	63	-	157
Europe	GBR		84	51	-	120		154	108	-	198
Europe	IBS		102	68	-	140		150	103	-	197
Europe	TSI		83	48	-	119		153	107	-	197
East Asia	CDX		63	25	-	104		109	61	-	158
East Asia	CHB		61	23	-	101		132	86	-	181
East Asia	CHS		65	28	-	106		137	91	-	181
East Asia	JPT		63	29	-	103		113	64	-	161
East Asia	KHV		62	24	-	101		135	89	-	183
Europe	under an East Asian demography		82.8	47.6	-	120.2		141	94.6	-	186.6
East Asia	under a European demography		62.8	25.8	-	103		125.2	78.2	-	172.8

## Sheet: Table S2F
Table S2F. Estimations using the 1000G ORs averaged across chromosomes and assuming various priors for s
			Sweeps (incomplete and complete sweeps)
			Combined prior for s (Table 1)a					Flat prior for s					Gamma prior for s					L-shape prior for s
				95%CI					95%CI					95%CI					95%CI
Continent	population		X	lower-upper				X	lower-upper				X	lower-upper				X	lower-upper
Africa	ESN		56	37	-	77		25	8	-	43		40	22	-	61		56	37	-	77
Africa	GWD		75	52	-	100		30	10	-	51		45	23	-	72		75	53	-	99
Africa	LWK		79	55	-	104		26	6	-	48		54	30	-	79		81	59	-	104
Africa	MSL		57	37	-	78		30	13	-	49		41	20	-	62		61	42	-	84
Africa	YRI		71	49	-	94		18	-2	-	38		45	23	-	69		67	46	-	90
Europe	CEU		94	48	-	139		68	19	-	112		92	47	-	135		104	62	-	144
Europe	FIN		99	53	-	145		64	22	-	110		84	39	-	131		120	78	-	163
Europe	GBR		126	78	-	169		115	72	-	159		111	64	-	158		129	84	-	169
Europe	IBS		133	87	-	179		99	57	-	142		103	61	-	145		142	98	-	185
Europe	TSI		121	74	-	166		105	60	-	151		103	58	-	150		127	79	-	168
East Asia	CDX		132	86	-	180		81	40	-	129		116	75	-	162		157	112	-	198
East Asia	CHB		174	130	-	220		91	52	-	130		102	65	-	144		191	146	-	233
East Asia	CHS		198	150	-	240		118	75	-	163		162	123	-	209		205	159	-	248
East Asia	JPT		152	105	-	197		89	48	-	128		111	72	-	155		173	131	-	216
East Asia	KHV		171	125	-	218		89	46	-	134		104	62	-	145		206	158	-	248
Africa	mean		67.6	46	-	90.6		25.8	7	-	45.8		45	23.6	-	68.6		68	47.4	-	90.8
Europe	mean		114.6	68	-	159.6		90.2	46	-	134.8		98.6	53.8	-	143.8		124.4	80.2	-	165.8
East Asia	mean		165.4	119.2	-	211		93.6	52.2	-	136.8		119	79.4	-	163		186.4	141.2	-	228.6
All	mean		115.867	77.7333	-	153.733		69.8667	35.0667	-	105.8		87.5333	52.2667	-	125.133		126.267	89.6	-	161.733
aestimations shown in Table 1 and Table S2A

## Sheet: Table S2G
Table S2G. Estimations using the 1000G ORs averaged across chromosomes and an extended prior for X
			Sweeps (incomplete and complete sweeps)
			X ~ U(0,300)a					Extended prior for Xb ( X ~ U(0,1000) )
			Combined prior for s (Table 1)					Combined prior for s					Gamma prior for s					L-shape prior for s
				95%CI					95%CI					95%CI					95%CI
Continent	population		X	lower-upper				X	lower-upper				X	lower-upper				X	lower-upper
Africa	ESN		56	37	-	77		61	36	-	89		51	28	-	76		67	42	-	95
Africa	GWD		75	52	-	100		78	48	-	108		62	36	-	89		90	63	-	119
Africa	LWK		79	55	-	104		81	50	-	112		59	32	-	88		91	65	-	119
Africa	MSL		57	37	-	78		62	36	-	89		47	24	-	72		72	48	-	101
Africa	YRI		71	49	-	94		80	51	-	109		62	37	-	88		96	68	-	124
Europe	CEU		94	48	-	139		103	60	-	145		90	52	-	129		98	61	-	137
Europe	FIN		99	53	-	145		110	72	-	149		84	50	-	120		104	67	-	141
Europe	GBR		126	78	-	169		160	120	-	201		103	69	-	142		145	106	-	183
Europe	IBS		133	87	-	179		124	86	-	163		87	53	-	125		124	86	-	163
Europe	TSI		121	74	-	166		136	98	-	177		102	68	-	140		128	92	-	165
East Asia	CDX		132	86	-	180		127	84		172		100	64	-	143		136	91		181
East Asia	CHB		174	130	-	220		135	96		179		97	60	-	142		145	105		189
East Asia	CHS		198	150	-	240		149	107		194		129	93	-	173		158	112		201
East Asia	JPT		152	105	-	197		122	81		164		79	44	-	119		142	103		184
East Asia	KHV		171	125	-	218		146	106		191		101	64	-	145		167	126		210
Africa	mean		67.6	46	-	90.6		72.4	44.2	-	101.4		56.2	31.4	-	82.6		83.2	57.2	-	111.6
Europe	mean		114.6	68	-	159.6		126.6	87.2	-	167		93.2	58.4	-	131.2		119.8	82.4	-	157.8
East Asia	mean		165.4	119.2	-	211		135.8	94.8	-	180		101.2	65	-	144.4		149.6	107.4	-	193
All	mean		115.867	77.7333	-	153.733		111.6	75.4	-	149.467		83.5333	51.6	-	119.4		117.533	82.3333	-	154.133
aestimations shown in Table 1 and Table S2A
bestimations performed assuming that X varies from 0 to 1,000 sweeps per population. To perform the ABC simulations X was randomly drawn from a uniform distribution, U(0 , 1000).
